# Supplementary material for: Rylene- and diaza-rylene-derived cobalt clusters for solid-state pyrolysis towards undoped and N-doped carbon nanoparticles
Source: Royal Society of Chemistry journal article supplement (doi:10.1039/d1dt02276h), 2021-01-01
Supplement: d1dt02276h1.pdf [file d1dt02276h1.pdf]

# Supporting Information

## **Rylene- and Diaza-rylene-derived Cobalt Clusters for the Solid-State Pyrolysis towards Undoped and N-doped Carbon Nanoparticles**

Simon Werner <sup>[a]</sup>, Tobias Vollgraff <sup>[a]</sup>, and Jörg Sundermeyer\*<sup>[a]</sup>

---

[a] S. Werner, T. Vollgraff, Prof. Dr. J. Sundermeyer  
Fachbereich Chemie and Materials Science Center  
Philipps-Universität Marburg, Hans-Meerwein-Straße 4  
35043 Marburg (Germany)  
E-Mail: JSU@staff.uni-marburg.de

# Contents

|                                                                    |           |
|--------------------------------------------------------------------|-----------|
| <b>IR Spectra</b> .....                                            | <b>2</b>  |
| <b>Optimized geometries (DFT)</b> .....                            | <b>4</b>  |
| <b>Additional SEM images of pyrolysis products of C2</b> .....     | <b>5</b>  |
| <b>Low resolution TEM images of pyrolysis products of C2</b> ..... | <b>6</b>  |
| <b>FD mass spectra</b> .....                                       | <b>6</b>  |
| <i>Co-complex N1</i> .....                                         | 6         |
| <i>Co-complex N2</i> .....                                         | 6         |
| <i>Co-complex C1</i> .....                                         | 7         |
| <b>NMR Spectra</b> .....                                           | <b>8</b>  |
| <i>Co-complex C1</i> .....                                         | 8         |
| <i>Co-complex C2</i> .....                                         | 9         |
| <i>Co-complex N1</i> .....                                         | 10        |
| <i>Co-complex N2</i> .....                                         | 11        |
| <b>Single crystal X-ray structures</b> .....                       | <b>12</b> |
| <i>Crystal Data</i> .....                                          | 12        |
| <i>Molecular structures of the title compounds</i> .....           | 14        |

## IR Spectra

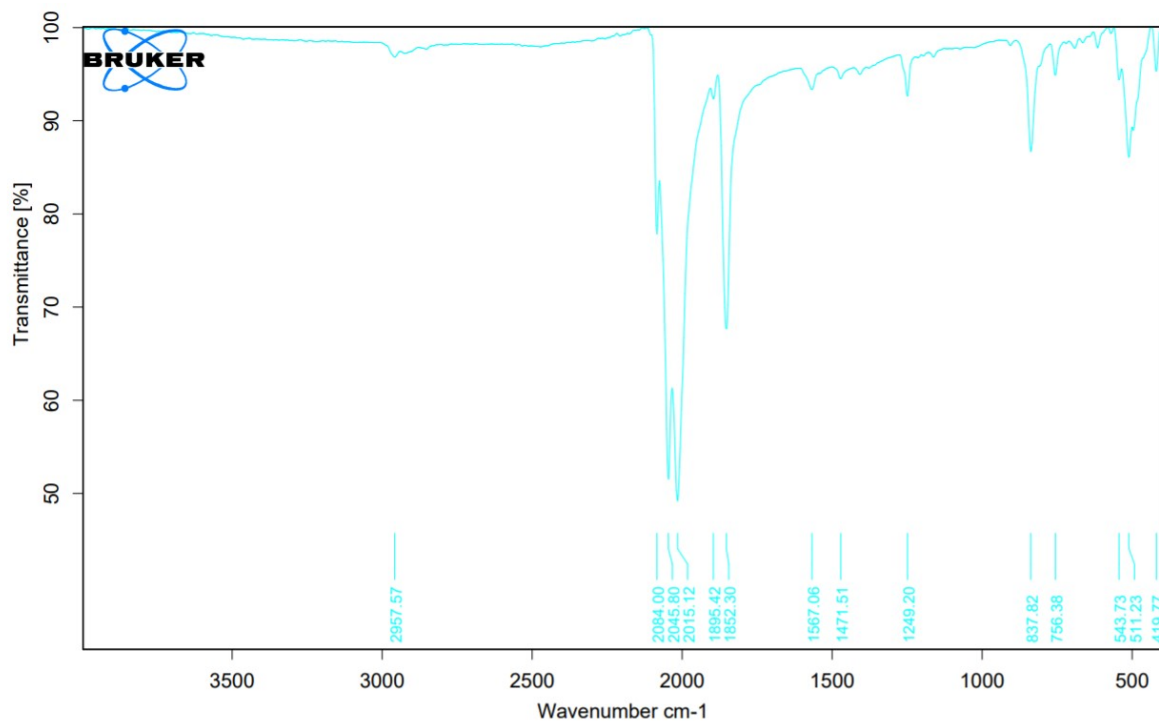

Figure S1. Measured ATR-FT-IR spectrum of compound C1 (neat substance).

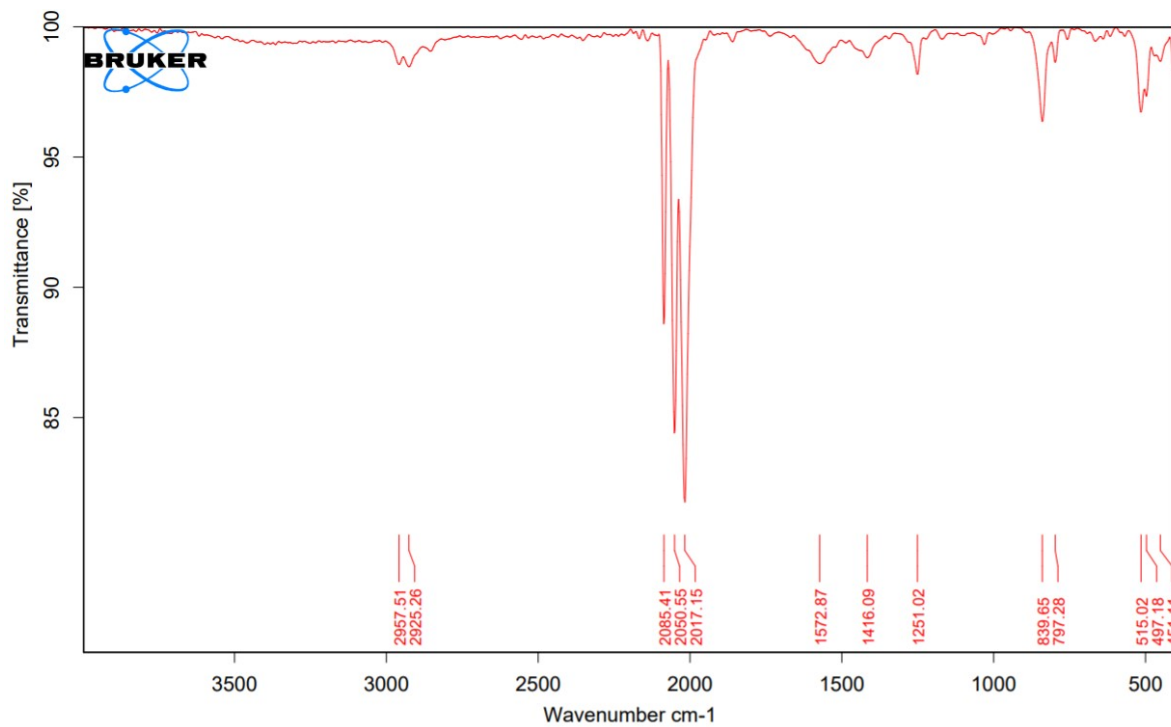

Figure S2. Measured ATR-FT-IR-spectrum of compound C2 (neat substance).

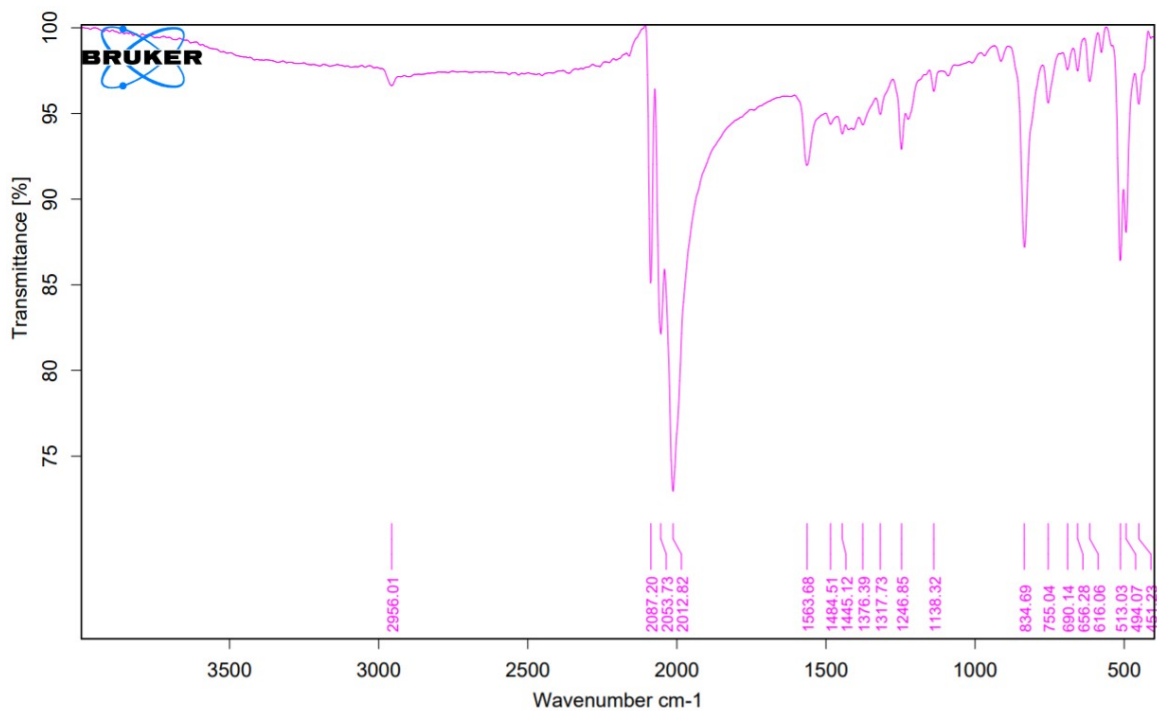

Figure S3. Measured ATR-FT-IR-spectrum of compound N1 (neat substance).

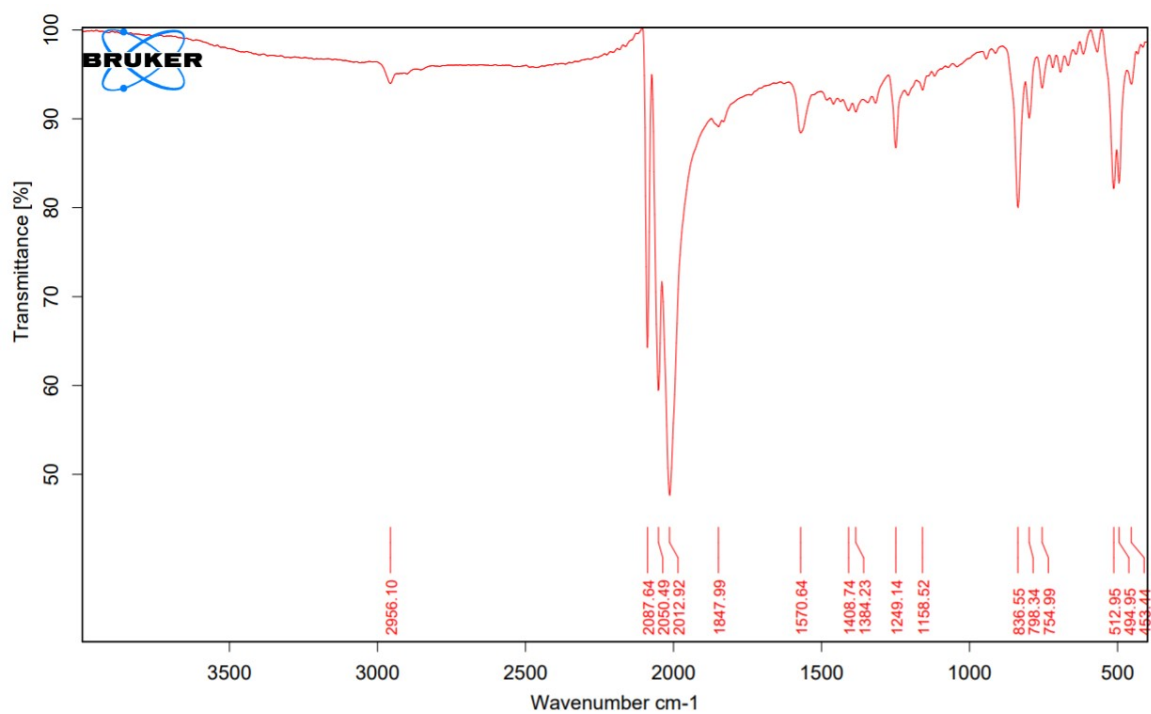

Figure S4. Measured ATR-FT-IR-spectrum of compound N2 (neat substance).

## Optimized geometries (DFT)

**Table S1.** Cartesian coordinates (XYZ) of DFT optimized geometry of the phenyl-model complex (def2-TZVPP/PBE).

|    |              |              |              |
|----|--------------|--------------|--------------|
| C  | 3.184006000  | 0.515229000  | 1.788314000  |
| C  | 3.852976000  | -0.587923000 | 1.247346000  |
| C  | 3.173378000  | -1.461591000 | 0.395568000  |
| C  | 1.833553000  | -1.235832000 | 0.084804000  |
| C  | 1.151289000  | -0.128500000 | 0.624025000  |
| C  | 1.846321000  | 0.743276000  | 1.480424000  |
| C  | -0.244419000 | 0.089127000  | 0.289101000  |
| Co | -1.237174000 | 1.578188000  | -0.550029000 |
| C  | -1.264981000 | -0.414010000 | -0.444859000 |
| Co | -1.909949000 | 0.147192000  | 1.356203000  |
| C  | -3.704520000 | 0.195148000  | 1.155254000  |
| C  | -1.720759000 | -1.377076000 | 2.229436000  |
| C  | -1.525790000 | 1.280841000  | 2.698072000  |
| C  | -2.871279000 | 1.982589000  | -1.205252000 |
| C  | -0.244867000 | 1.784427000  | -1.997100000 |
| C  | -0.701029000 | 3.032341000  | 0.361829000  |
| O  | -1.582505000 | -2.372724000 | 2.795188000  |
| O  | -4.851271000 | 0.210880000  | 1.039699000  |
| O  | -1.272832000 | 1.989980000  | 3.571170000  |
| O  | 0.412858000  | 1.911028000  | -2.936221000 |
| O  | -3.906471000 | 2.250544000  | -1.635364000 |
| O  | -0.343605000 | 3.970794000  | 0.928312000  |
| Si | -1.823806000 | -1.730282000 | -1.636870000 |
| C  | -3.614772000 | -1.455061000 | -2.121890000 |
| C  | -1.632020000 | -3.400694000 | -0.787055000 |
| C  | -0.717899000 | -1.636980000 | -3.159074000 |
| H  | 3.710089000  | 1.200401000  | 2.453531000  |
| H  | 4.901107000  | -0.764707000 | 1.489727000  |
| H  | 3.689065000  | -2.323320000 | -0.029498000 |
| H  | 1.300218000  | -1.915609000 | -0.579717000 |
| H  | 1.325095000  | 1.603030000  | 1.901442000  |
| H  | -3.753998000 | -0.490164000 | -2.626961000 |
| H  | -3.938896000 | -2.245518000 | -2.814360000 |
| H  | -4.280800000 | -1.480751000 | -1.249445000 |
| H  | -0.604865000 | -3.565491000 | -0.433617000 |
| H  | -1.882220000 | -4.210413000 | -1.488071000 |
| H  | -2.302755000 | -3.485866000 | 0.078460000  |
| H  | -0.963073000 | -2.453472000 | -3.853986000 |
| H  | -0.856297000 | -0.687587000 | -3.693476000 |
| H  | 0.345698000  | -1.723646000 | -2.897662000 |

**Table S2.** Cartesian coordinates (XYZ) of DFT optimized geometry of the 1-pyridinyl-model complex (def2-TZVPP/PBE)

|    |              |              |              |
|----|--------------|--------------|--------------|
| C  | 3.004925000  | 0.597290000  | 1.782018000  |
| C  | 3.796615000  | -0.462854000 | 1.326038000  |
| C  | 3.215996000  | -1.399159000 | 0.471835000  |
| C  | 1.880274000  | -1.240161000 | 0.110932000  |
| C  | 1.164751000  | -0.141912000 | 0.620638000  |
| N  | 1.723845000  | 0.765528000  | 1.447188000  |
| C  | -0.231831000 | 0.045982000  | 0.261287000  |
| Co | -1.203895000 | 1.540815000  | -0.556558000 |
| C  | -1.252816000 | -0.455254000 | -0.470529000 |
| Co | -1.873217000 | 0.102609000  | 1.343323000  |
| C  | -3.666145000 | 0.209997000  | 1.185659000  |
| C  | -1.730188000 | -1.435318000 | 2.198189000  |
| C  | -1.401070000 | 1.209161000  | 2.690264000  |
| C  | -2.840908000 | 2.020168000  | -1.139316000 |
| C  | -0.278651000 | 1.747244000  | -2.045153000 |
| C  | -0.553130000 | 2.949222000  | 0.370890000  |

|    |              |              |              |
|----|--------------|--------------|--------------|
| O  | -1.622605000 | -2.441549000 | 2.753002000  |
| O  | -4.814389000 | 0.261247000  | 1.094419000  |
| O  | -1.104853000 | 1.891589000  | 3.567764000  |
| O  | 0.335529000  | 1.874972000  | -3.013926000 |
| O  | -3.881634000 | 2.332283000  | -1.525024000 |
| O  | -0.129603000 | 3.859908000  | 0.931390000  |
| Si | -1.846784000 | -1.751851000 | -1.664227000 |
| C  | -3.631880000 | -1.422068000 | -2.135076000 |
| C  | -1.690320000 | -3.431128000 | -0.824455000 |
| C  | -0.745030000 | -1.686011000 | -3.191241000 |
| H  | 3.425435000  | 1.351513000  | 2.452864000  |
| H  | 4.838120000  | -0.545814000 | 1.635478000  |
| H  | 3.793907000  | -2.241819000 | 0.090735000  |
| H  | 1.384890000  | -1.946999000 | -0.554236000 |
| H  | -3.743885000 | -0.446911000 | -2.627400000 |
| H  | -3.986560000 | -2.194024000 | -2.833230000 |
| H  | -4.290519000 | -1.435544000 | -1.256619000 |
| H  | -0.664377000 | -3.620675000 | -0.479262000 |
| H  | -1.962776000 | -4.231545000 | -1.527858000 |
| H  | -2.356486000 | -3.505908000 | 0.045391000  |
| H  | -1.021944000 | -2.488305000 | -3.890802000 |
| H  | -0.849403000 | -0.728630000 | -3.718842000 |
| H  | 0.315616000  | -1.814589000 | -2.934250000 |

### Additional SEM images of pyrolysis products of C2

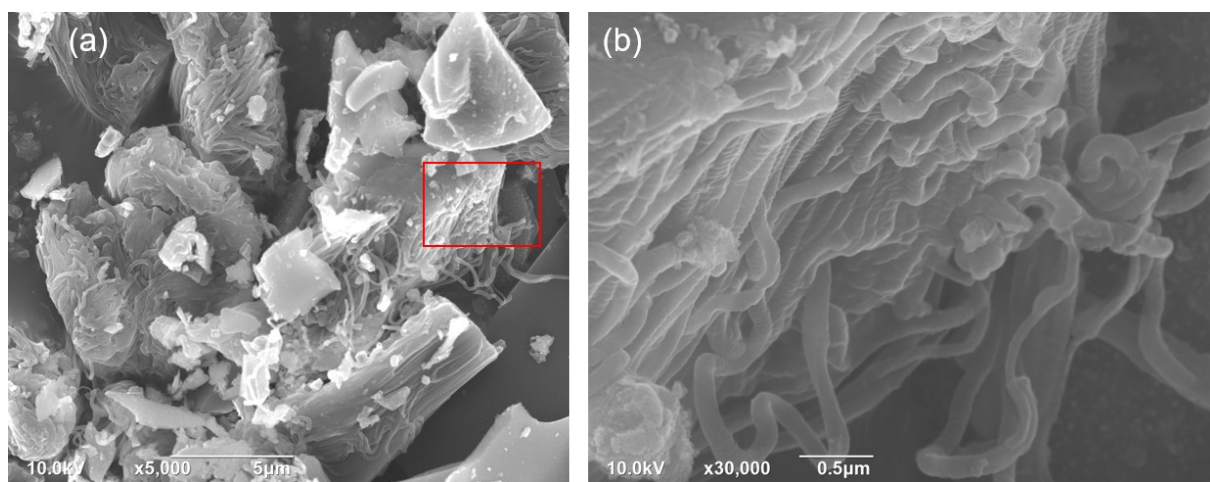

**Figure S5.** (a) and (b) Bundles of agglomerated carbon nanotubes obtained after SSP of C2.

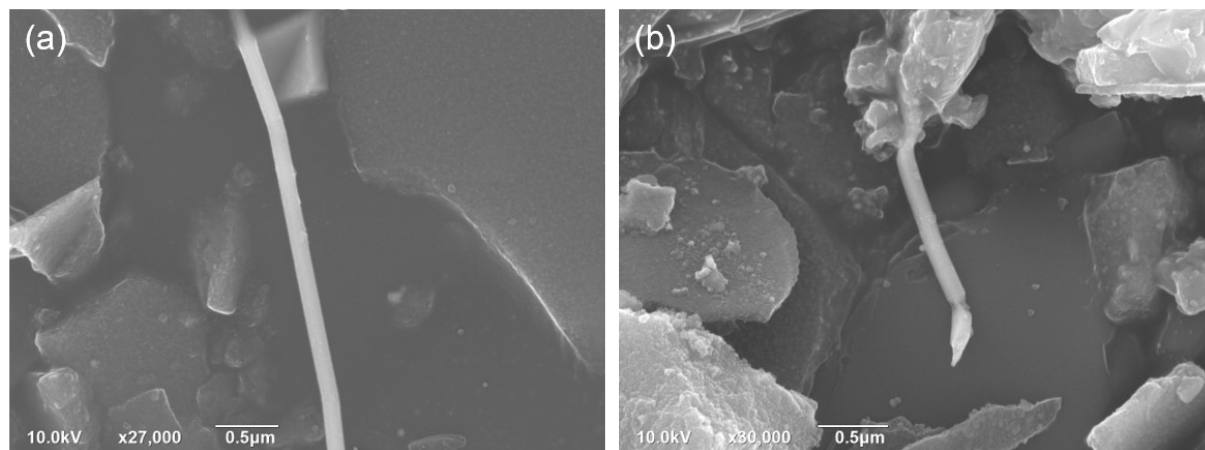

**Figure S6.** (a) and (b) Isolated larger fibrous-type carbon nanotubes after SSP of C2.

## Low resolution TEM images of pyrolysis products of C2

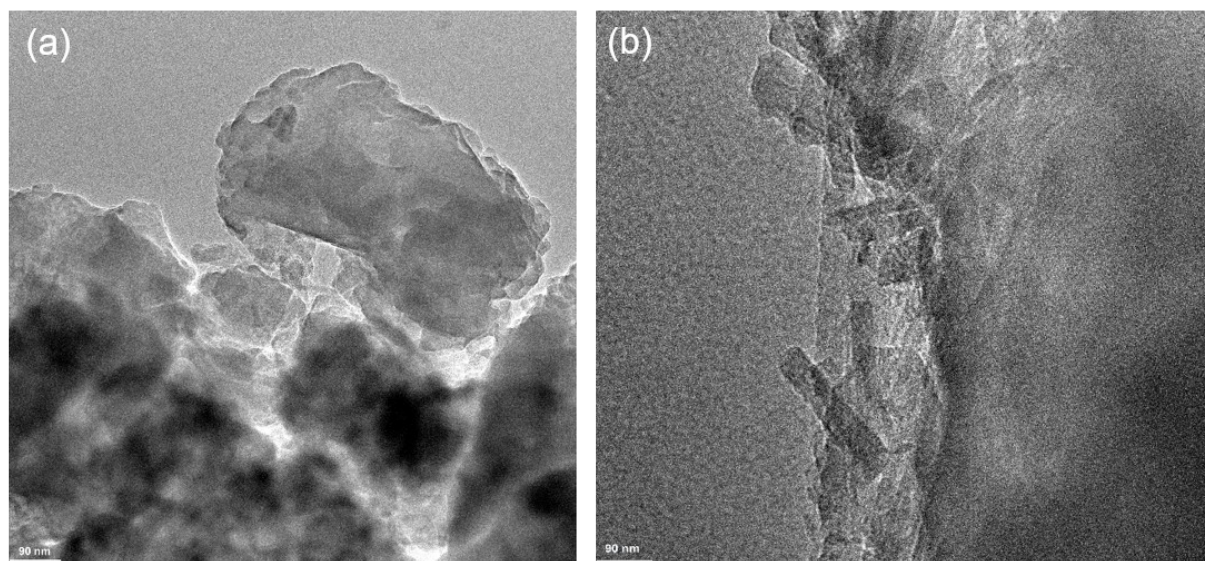

**Figure S7.** (a) and (b) Low resolution bright field TEM images of agglomerated carbon nanotubes and nanoparticles obtained after SSP of C2.

## FD mass spectra

### *Co-complex N1*

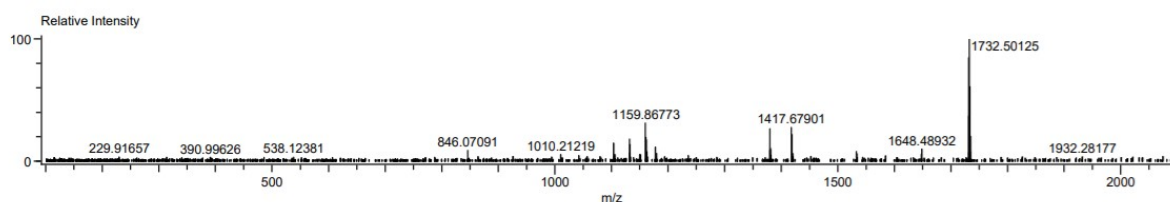

**Figure S8.** FD(+) MS spectrum of N1.

### *Co-complex N2*

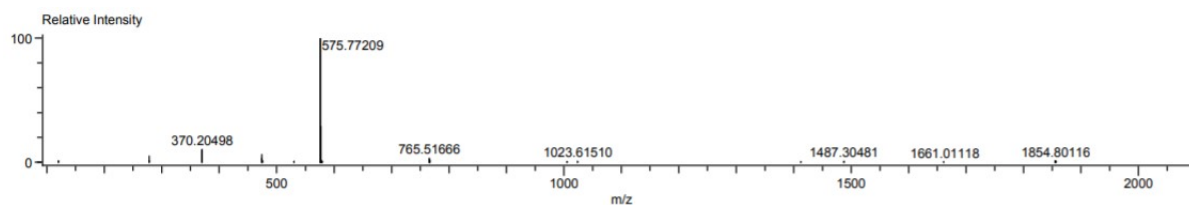

**Figure S9.** FD(+) MS spectrum of N2.

## Co-complex C1

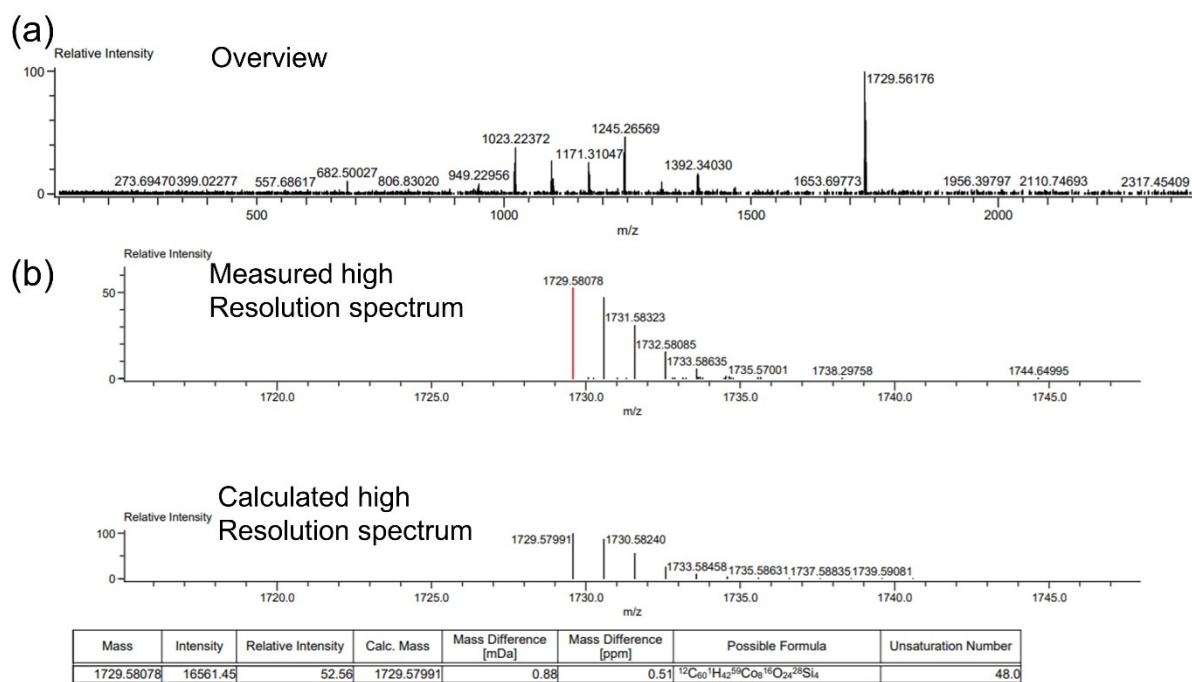

Figure S10. FD(+)-MS spectrum of C1: (a) Overview spectrum; (b) calculated and measured high resolution mass peak.



## NMR Spectra

### Co-complex C1

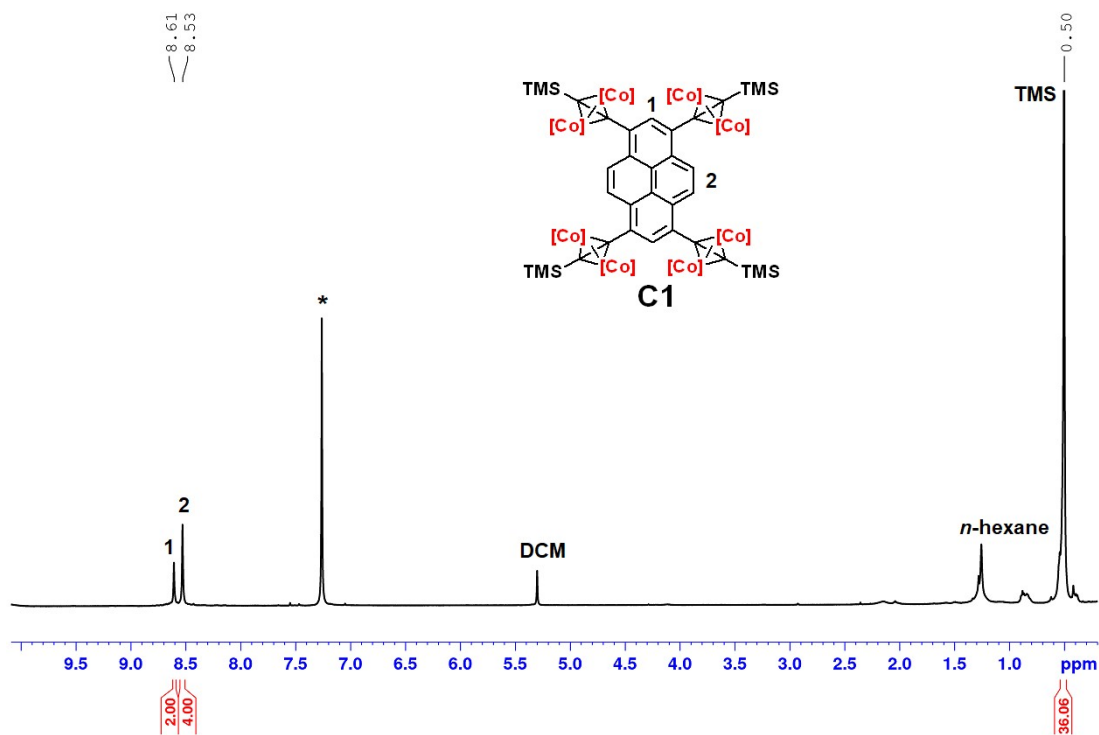

**Figure S11.**  $^1\text{H}$  NMR (500.1 MHz, 298K,  $\text{CDCl}_3^*$ ) of **C1**. Contains solvent residues. The  $[\text{Co}(\text{CO})_3]$  units are abbreviated with [Co].

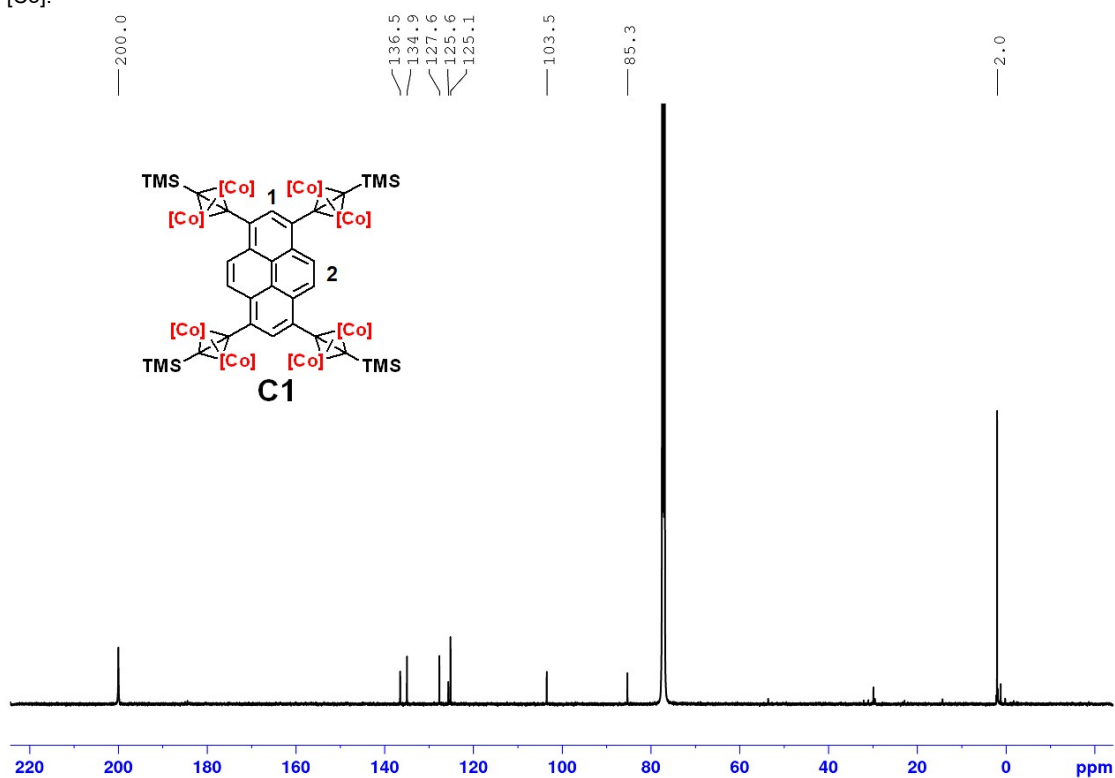

**Figure S12.**  $^{13}\text{C}$  NMR (125.8 MHz, 298K,  $\text{CDCl}_3^*$ ) of **C1**. Contains solvent residues. The  $[\text{Co}(\text{CO})_3]$  units are abbreviated with [Co].

## Co-complex C2

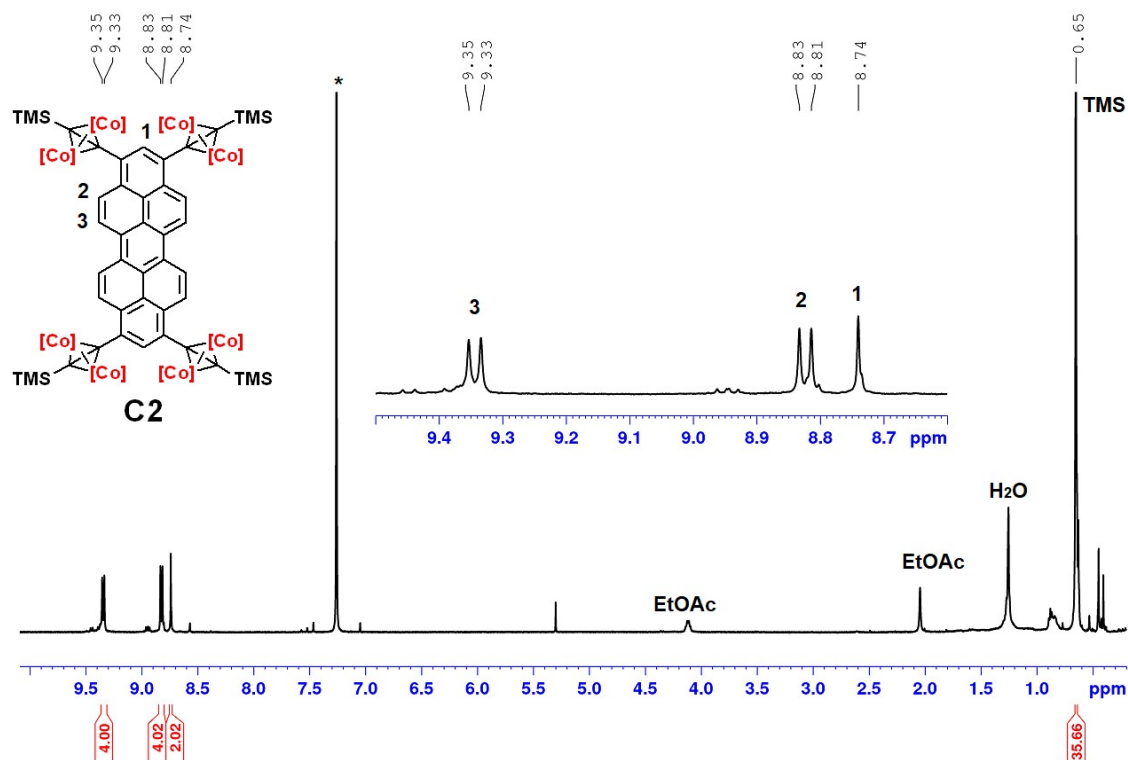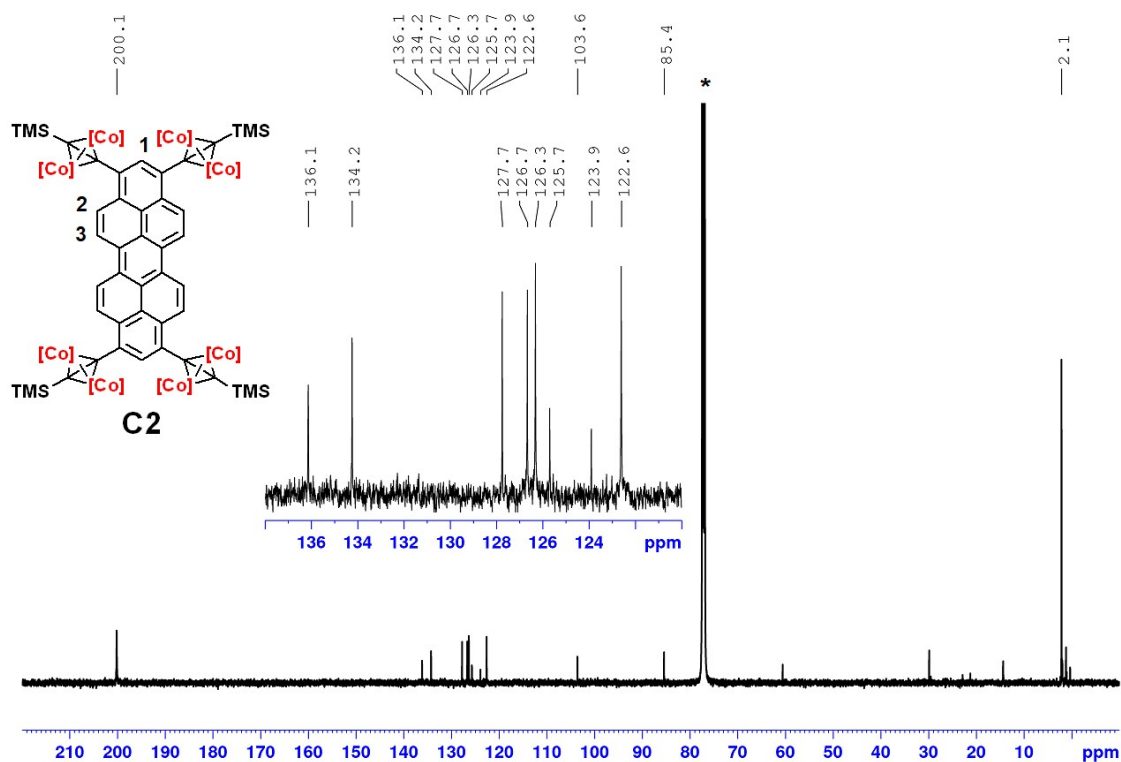

## Co-complex N1

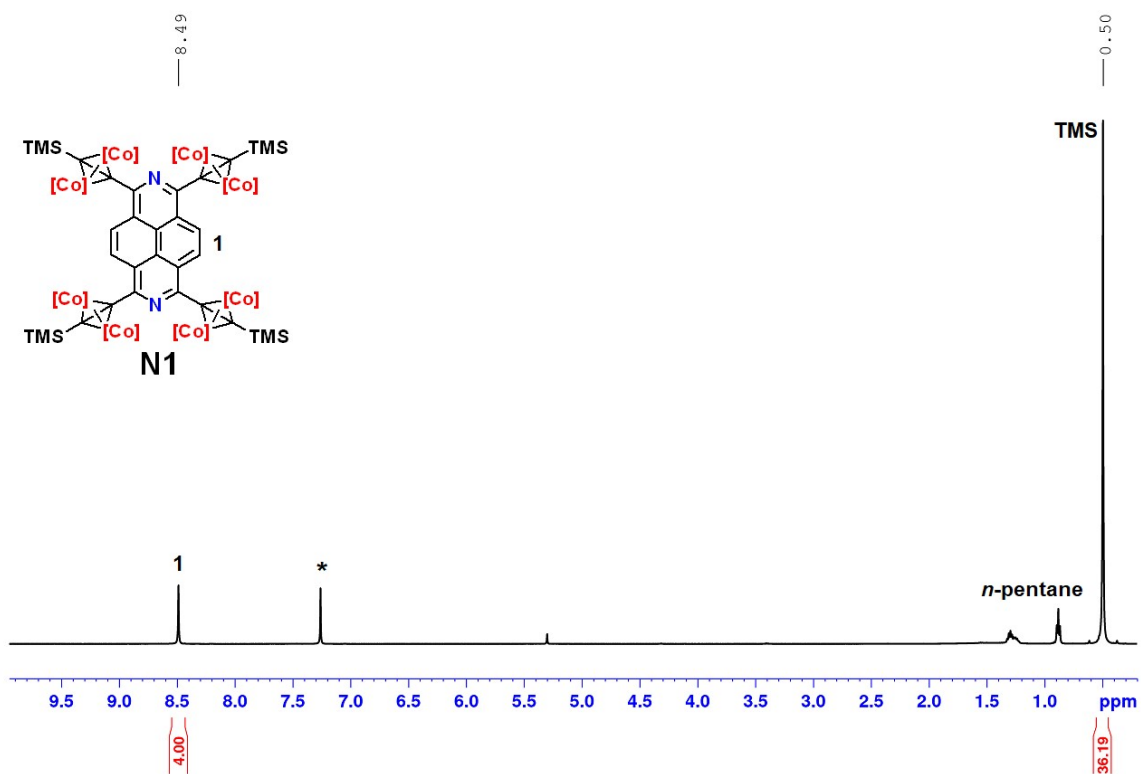

**Figure S15.**  $^1\text{H}$  NMR (500.1 MHz, 298K,  $\text{CDCl}_3^*$ ) of **N1**. Contains solvent residues. The  $[\text{Co}(\text{CO})_3]$  units are abbreviated with [Co].

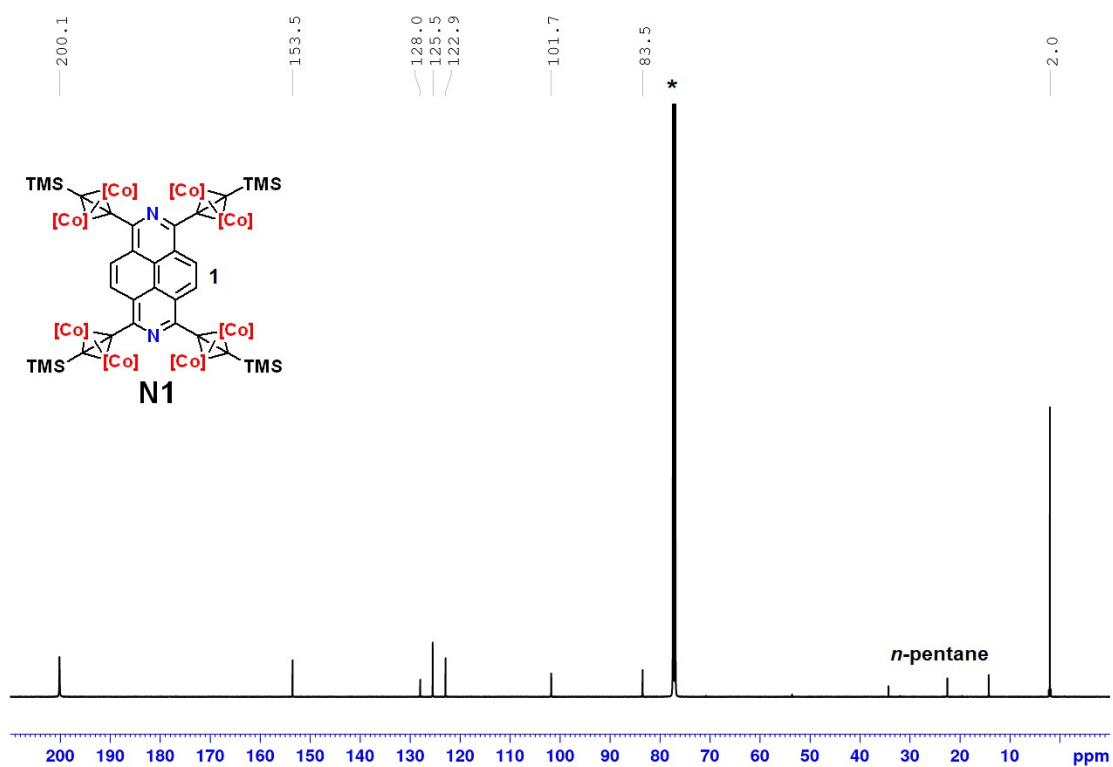

**Figure S16.**  $^{13}\text{C}$  NMR (125.8 MHz, 298K,  $\text{CDCl}_3^*$ ) of **N1**. Contains solvent residues. The  $[\text{Co}(\text{CO})_3]$  units are abbreviated with [Co].

### Co-complex N2

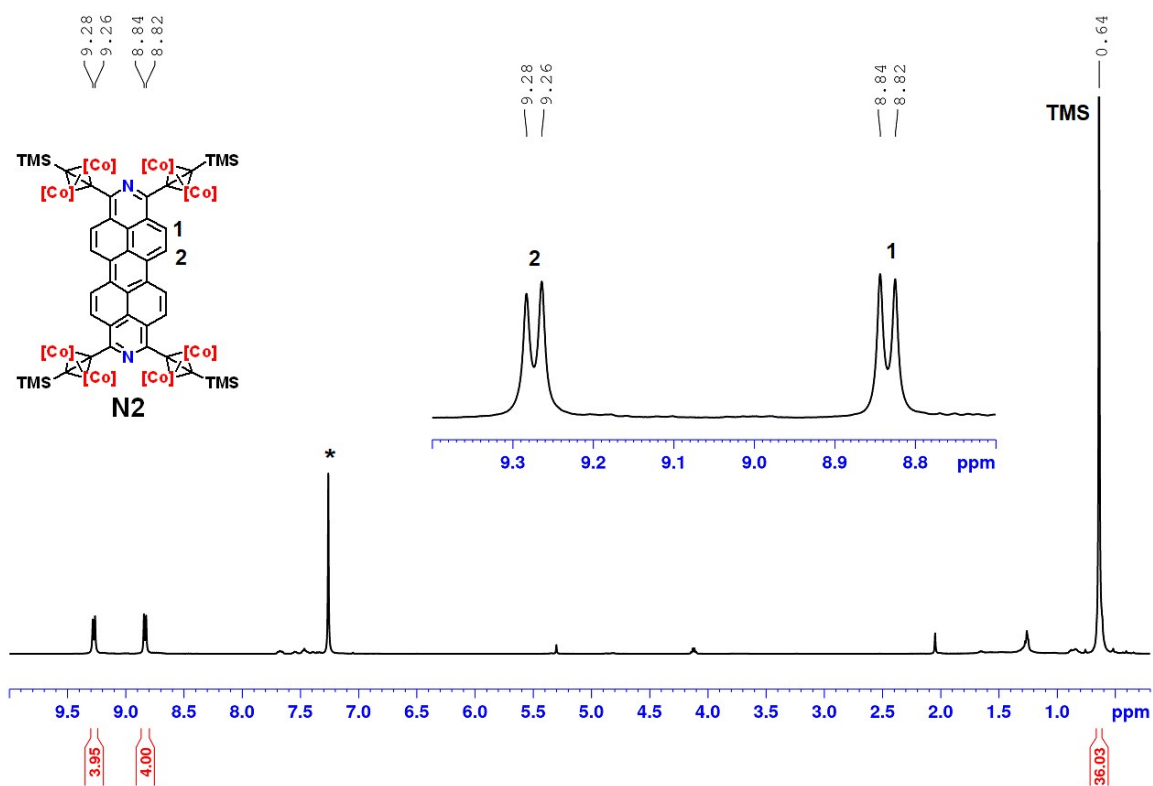

**Figure S17.**  $^1\text{H}$  NMR (500.1 MHz, 298K,  $\text{CDCl}_3^*$ ) of **N2**. Contains solvent residues. The  $[\text{Co}(\text{CO})_3]$  units are abbreviated with [Co].

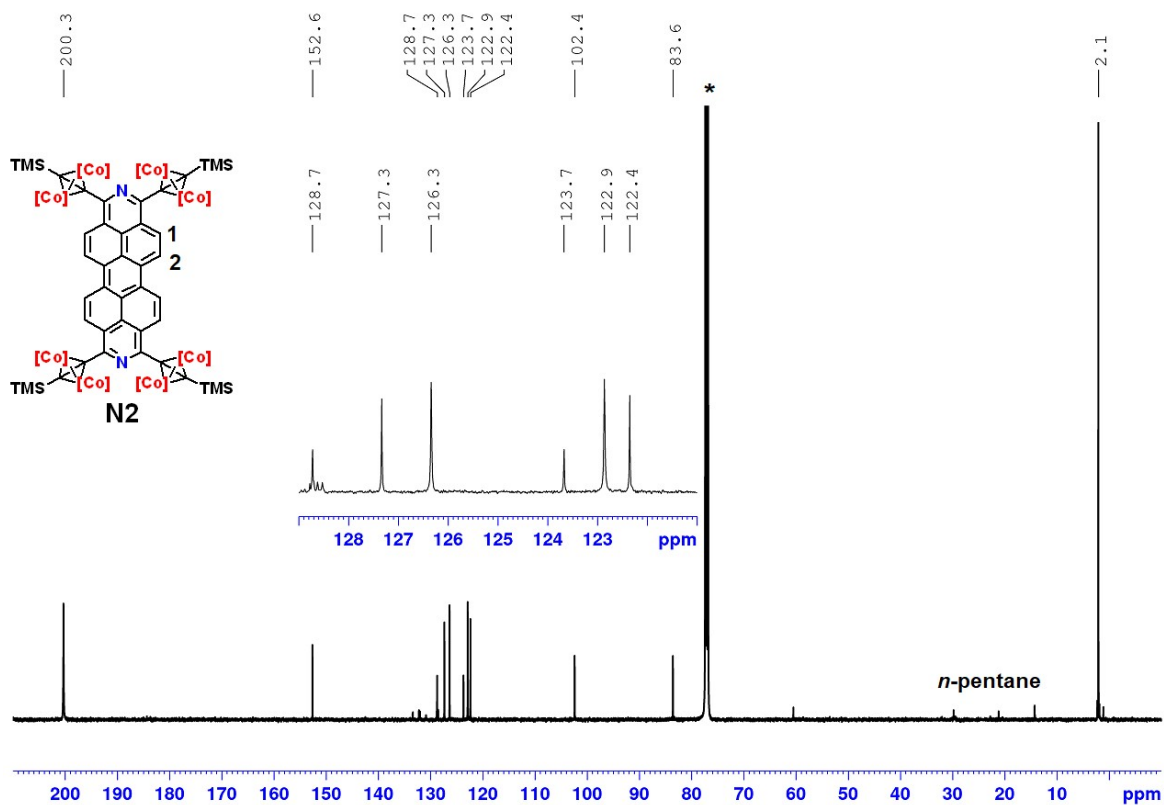

**Figure S18.**  $^{13}\text{C}$  NMR (125.8 MHz, 298K,  $\text{CDCl}_3^*$ ) of **N2**. Contains solvent residues. The  $[\text{Co}(\text{CO})_3]$  units are abbreviated with [Co].

## Single crystal X-ray structures

### Crystal Data

**Table 1.** Crystal data and structure refinement for complex **N1**.

|                                   |                                             |                |
|-----------------------------------|---------------------------------------------|----------------|
| Identification code               | SWP217_0m_a                                 |                |
| Empirical formula                 | C68 H64 Co8 N2 O24 Si4                      |                |
| Formula weight                    | 1877.01                                     |                |
| Temperature                       | 100(2) K                                    |                |
| Wavelength                        | 0.71073 Å                                   |                |
| Crystal system                    | Monoclinic                                  |                |
| Space group                       | C 2/c                                       |                |
| Unit cell dimensions              | a = 18.165(4) Å                             | a = 90°.       |
|                                   | b = 15.847(3) Å                             | b = 98.73(3)°. |
|                                   | c = 28.456(6) Å                             | g = 90°.       |
| Volume                            | 8096(3) Å <sup>3</sup>                      |                |
| Z                                 | 4                                           |                |
| Density (calculated)              | 1.540 Mg/m <sup>3</sup>                     |                |
| Absorption coefficient            | 1.727 mm <sup>-1</sup>                      |                |
| F(000)                            | 3800                                        |                |
| Crystal size                      | 0.305 x 0.168 x 0.110 mm <sup>3</sup>       |                |
| Theta range for data collection   | 2.130 to 25.752°.                           |                |
| Index ranges                      | -22<=h<=22, -19<=k<=19, -34<=l<=34          |                |
| Reflections collected             | 145737                                      |                |
| Independent reflections           | 7743 [R(int) = 0.0562]                      |                |
| Completeness to theta = 25.000°   | 99.9 %                                      |                |
| Absorption correction             | Semi-empirical from equivalents             |                |
| Max. and min. transmission        | 0.7453 and 0.6979                           |                |
| Refinement method                 | Full-matrix least-squares on F <sup>2</sup> |                |
| Data / restraints / parameters    | 7743 / 37 / 517                             |                |
| Goodness-of-fit on F <sup>2</sup> | 1.036                                       |                |
| Final R indices [I>2sigma(I)]     | R1 = 0.0250, wR2 = 0.0529                   |                |
| R indices (all data)              | R1 = 0.0316, wR2 = 0.0550                   |                |
| Extinction coefficient            | n/a                                         |                |
| Largest diff. peak and hole       | 0.546 and -0.421 e.Å <sup>-3</sup>          |                |

**Table 2.** Crystal data and structure refinement for complex **N2**.

|                                   |                                             |                   |
|-----------------------------------|---------------------------------------------|-------------------|
| Identification code               | swp60_0m_a                                  |                   |
| Empirical formula                 | C70 H48 Cl4 Co8 N2 O24 Si4                  |                   |
| Formula weight                    | 2026.70                                     |                   |
| Temperature                       | 100(2) K                                    |                   |
| Wavelength                        | 0.71073 Å                                   |                   |
| Crystal system                    | Triclinic                                   |                   |
| Space group                       | P -1                                        |                   |
| Unit cell dimensions              | a = 8.276(7) Å                              | a = 101.762(19)°. |
|                                   | b = 14.505(12) Å                            | b = 99.807(18)°.  |
|                                   | c = 17.743(14) Å                            | g = 94.55(3)°.    |
| Volume                            | 2040(3) Å <sup>3</sup>                      |                   |
| Z                                 | 1                                           |                   |
| Density (calculated)              | 1.650 Mg/m <sup>3</sup>                     |                   |
| Absorption coefficient            | 1.847 mm <sup>-1</sup>                      |                   |
| F(000)                            | 1014                                        |                   |
| Crystal size                      | 0.413 x 0.085 x 0.081 mm <sup>3</sup>       |                   |
| Theta range for data collection   | 2.389 to 25.253°.                           |                   |
| Index ranges                      | -9<=h<=9, -17<=k<=17, -20<=l<=21            |                   |
| Reflections collected             | 44042                                       |                   |
| Independent reflections           | 7323 [R(int) = 0.0793]                      |                   |
| Completeness to theta = 25.000°   | 99.7 %                                      |                   |
| Absorption correction             | Semi-empirical from equivalents             |                   |
| Max. and min. transmission        | 0.7452 and 0.6048                           |                   |
| Refinement method                 | Full-matrix least-squares on F <sup>2</sup> |                   |
| Data / restraints / parameters    | 7323 / 490 / 557                            |                   |
| Goodness-of-fit on F <sup>2</sup> | 1.040                                       |                   |
| Final R indices [I>2sigma(I)]     | R1 = 0.0472, wR2 = 0.1026                   |                   |
| R indices (all data)              | R1 = 0.0714, wR2 = 0.1120                   |                   |
| Extinction coefficient            | n/a                                         |                   |
| Largest diff. peak and hole       | 1.174 and -0.905 e.Å <sup>-3</sup>          |                   |

Molecular structures of the title compounds

Complex N1

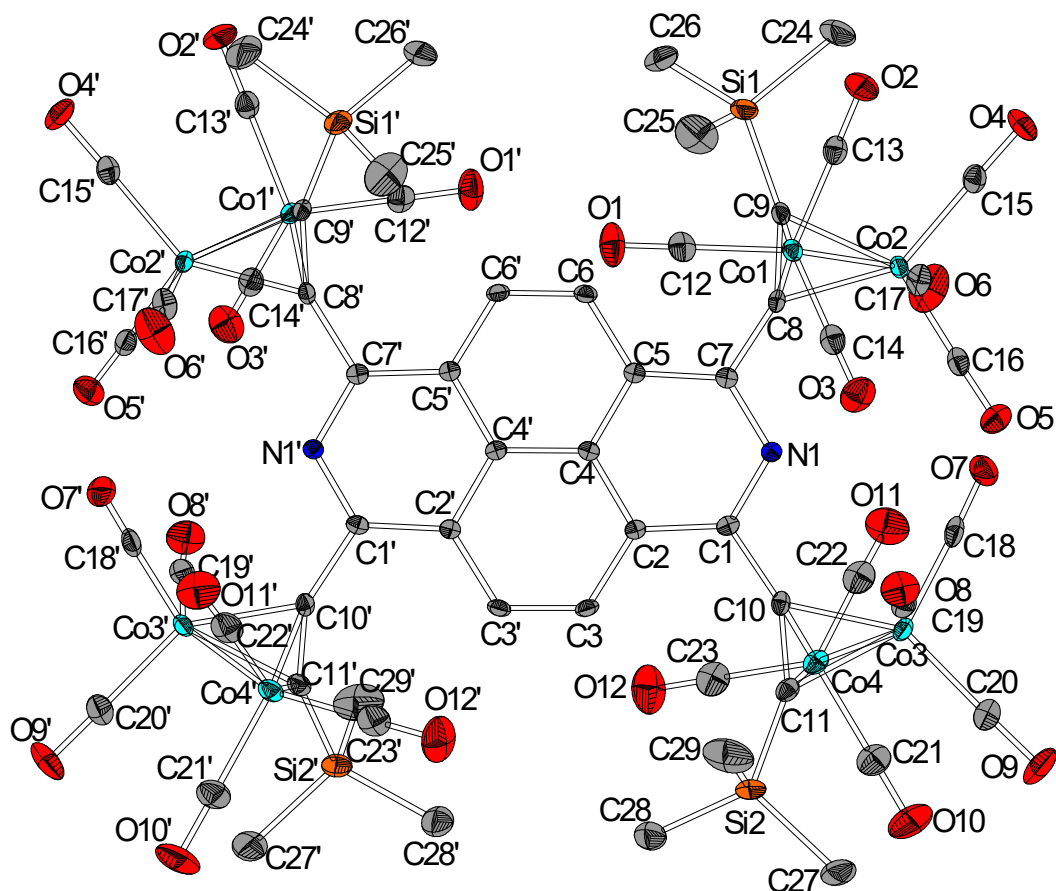

**Figure S19.** Reduced cell of the crystallographically determined molecular structure of **N1**. Protons are not shown. Symmetry transformations: 1  $-x+1, y, -z+1/2$

**Table 3.** Bond lengths [Å] and angles [°] **N1**.

|             |            |
|-------------|------------|
| C(1)-N(1)   | 1.346(2)   |
| C(1)-C(2)   | 1.419(3)   |
| C(1)-C(10)  | 1.465(3)   |
| C(2)-C(4)   | 1.412(3)   |
| C(2)-C(3)   | 1.427(3)   |
| C(3)-C(3)#1 | 1.353(4)   |
| C(3)-H(3)   | 0.9500     |
| C(4)-C(5)   | 1.412(3)   |
| C(4)-C(4)#1 | 1.430(4)   |
| C(5)-C(7)   | 1.421(3)   |
| C(5)-C(6)   | 1.429(3)   |
| C(6)-C(6)#1 | 1.357(4)   |
| C(6)-H(6)   | 0.9500     |
| C(7)-N(1)   | 1.344(2)   |
| C(7)-C(8)   | 1.464(3)   |
| C(8)-C(9)   | 1.347(3)   |
| C(8)-Co(2)  | 1.9425(19) |
| C(8)-Co(1)  | 1.9947(19) |
| C(9)-Si(1)  | 1.861(2)   |
| C(9)-Co(2)  | 1.9858(19) |
| C(9)-Co(1)  | 1.9868(19) |
| C(10)-C(11) | 1.346(3)   |



|              |            |
|--------------|------------|
| C(10)-Co(3)  | 1.9381(19) |
| C(10)-Co(4)  | 1.9930(19) |
| C(11)-Si(2)  | 1.861(2)   |
| C(11)-Co(4)  | 1.988(2)   |
| C(11)-Co(3)  | 1.997(2)   |
| C(12)-O(1)   | 1.137(3)   |
| C(12)-Co(1)  | 1.798(2)   |
| C(13)-O(2)   | 1.132(2)   |
| C(13)-Co(1)  | 1.820(2)   |
| C(14)-O(3)   | 1.128(3)   |
| C(14)-Co(1)  | 1.832(2)   |
| C(15)-O(4)   | 1.135(2)   |
| C(15)-Co(2)  | 1.822(2)   |
| C(16)-O(5)   | 1.133(2)   |
| C(16)-Co(2)  | 1.827(2)   |
| C(17)-O(6)   | 1.134(3)   |
| C(17)-Co(2)  | 1.797(2)   |
| C(18)-O(7)   | 1.134(3)   |
| C(18)-Co(3)  | 1.815(2)   |
| C(19)-O(8)   | 1.134(3)   |
| C(19)-Co(3)  | 1.796(2)   |
| C(20)-O(9)   | 1.132(3)   |
| C(20)-Co(3)  | 1.834(2)   |
| C(21)-O(10)  | 1.135(3)   |
| C(21)-Co(4)  | 1.820(2)   |
| C(22)-O(11)  | 1.134(3)   |
| C(22)-Co(4)  | 1.818(2)   |
| C(23)-O(12)  | 1.134(3)   |
| C(23)-Co(4)  | 1.803(2)   |
| C(24)-Si(1)  | 1.860(2)   |
| C(24)-H(24A) | 0.9800     |
| C(24)-H(24B) | 0.9800     |
| C(24)-H(24C) | 0.9800     |
| C(25)-Si(1)  | 1.864(3)   |
| C(25)-H(25A) | 0.9800     |
| C(25)-H(25B) | 0.9800     |
| C(25)-H(25C) | 0.9800     |
| C(26)-Si(1)  | 1.868(3)   |
| C(26)-H(26A) | 0.9800     |
| C(26)-H(26B) | 0.9800     |
| C(26)-H(26C) | 0.9800     |
| C(27)-Si(2)  | 1.849(2)   |
| C(27)-H(27A) | 0.9800     |
| C(27)-H(27B) | 0.9800     |
| C(27)-H(27C) | 0.9800     |
| C(31)-C(30)  | 1.452(6)   |
| C(31)-C(32)  | 1.534(4)   |
| C(31)-C(36)  | 1.544(11)  |
| C(31)-H(31A) | 0.9900     |
| C(31)-H(31B) | 0.9900     |
| C(32)-C(33)  | 1.471(4)   |
| C(32)-H(32A) | 0.9900     |
| C(32)-H(32B) | 0.9900     |
| C(33)-C(34)  | 1.489(4)   |
| C(33)-H(33A) | 0.9900     |
| C(33)-H(33B) | 0.9900     |
| C(34)-H(34A) | 0.9800     |
| C(34)-H(34B) | 0.9800     |
| C(34)-H(34C) | 0.9800     |
| Co(1)-Co(2)  | 2.4674(7)  |
| Co(3)-Co(4)  | 2.4691(7)  |
| Si(2)-C(37)  | 1.83(3)    |
| Si(2)-C(28)  | 1.833(4)   |
| Si(2)-C(29)  | 1.894(13)  |
| Si(2)-C(35)  | 1.986(9)   |
| C(28)-H(28A) | 0.9800     |
| C(28)-H(28B) | 0.9800     |

|                   |            |
|-------------------|------------|
| C(28)-H(28C)      | 0.9800     |
| C(29)-H(29A)      | 0.9800     |
| C(29)-H(29B)      | 0.9800     |
| C(29)-H(29C)      | 0.9800     |
| C(30)-H(30A)      | 0.9800     |
| C(30)-H(30B)      | 0.9800     |
| C(30)-H(30C)      | 0.9800     |
| C(35)-H(35A)      | 0.9800     |
| C(35)-H(35B)      | 0.9800     |
| C(35)-H(35C)      | 0.9800     |
| C(36)-H(36A)      | 0.9800     |
| C(36)-H(36B)      | 0.9800     |
| C(36)-H(36C)      | 0.9800     |
| C(37)-H(37A)      | 0.9800     |
| C(37)-H(37B)      | 0.9800     |
| C(37)-H(37C)      | 0.9800     |
|                   |            |
| N(1)-C(1)-C(2)    | 122.76(16) |
| N(1)-C(1)-C(10)   | 116.69(16) |
| C(2)-C(1)-C(10)   | 120.55(16) |
| C(4)-C(2)-C(1)    | 117.44(16) |
| C(4)-C(2)-C(3)    | 118.42(17) |
| C(1)-C(2)-C(3)    | 124.15(17) |
| C(3)#1-C(3)-C(2)  | 121.50(11) |
| C(3)#1-C(3)-H(3)  | 119.2      |
| C(2)-C(3)-H(3)    | 119.2      |
| C(5)-C(4)-C(2)    | 119.84(16) |
| C(5)-C(4)-C(4)#1  | 120.11(11) |
| C(2)-C(4)-C(4)#1  | 120.04(10) |
| C(4)-C(5)-C(7)    | 117.75(16) |
| C(4)-C(5)-C(6)    | 118.37(17) |
| C(7)-C(5)-C(6)    | 123.87(17) |
| C(6)#1-C(6)-C(5)  | 121.45(11) |
| C(6)#1-C(6)-H(6)  | 119.3      |
| C(5)-C(6)-H(6)    | 119.3      |
| N(1)-C(7)-C(5)    | 122.38(16) |
| N(1)-C(7)-C(8)    | 117.11(16) |
| C(5)-C(7)-C(8)    | 120.50(16) |
| C(9)-C(8)-C(7)    | 144.02(18) |
| C(9)-C(8)-Co(2)   | 71.69(11)  |
| C(7)-C(8)-Co(2)   | 135.91(14) |
| C(9)-C(8)-Co(1)   | 69.91(11)  |
| C(7)-C(8)-Co(1)   | 129.56(13) |
| Co(2)-C(8)-Co(1)  | 77.60(7)   |
| C(8)-C(9)-Si(1)   | 149.97(15) |
| C(8)-C(9)-Co(2)   | 68.22(11)  |
| Si(1)-C(9)-Co(2)  | 129.98(10) |
| C(8)-C(9)-Co(1)   | 70.54(11)  |
| Si(1)-C(9)-Co(1)  | 131.76(10) |
| Co(2)-C(9)-Co(1)  | 76.79(7)   |
| C(11)-C(10)-C(1)  | 145.04(18) |
| C(11)-C(10)-Co(3) | 72.38(12)  |
| C(1)-C(10)-Co(3)  | 132.38(14) |
| C(11)-C(10)-Co(4) | 70.03(11)  |
| C(1)-C(10)-Co(4)  | 131.68(13) |
| Co(3)-C(10)-Co(4) | 77.81(7)   |
| C(10)-C(11)-Si(2) | 149.17(16) |
| C(10)-C(11)-Co(4) | 70.44(11)  |
| Si(2)-C(11)-Co(4) | 134.45(11) |
| C(10)-C(11)-Co(3) | 67.65(11)  |
| Si(2)-C(11)-Co(3) | 128.27(10) |
| Co(4)-C(11)-Co(3) | 76.57(8)   |
| O(1)-C(12)-Co(1)  | 179.8(2)   |
| O(2)-C(13)-Co(1)  | 177.59(19) |
| O(3)-C(14)-Co(1)  | 179.6(2)   |
| O(4)-C(15)-Co(2)  | 178.47(19) |
| O(5)-C(16)-Co(2)  | 178.02(18) |

|                     |            |
|---------------------|------------|
| O(6)-C(17)-Co(2)    | 178.10(19) |
| O(7)-C(18)-Co(3)    | 177.32(19) |
| O(8)-C(19)-Co(3)    | 176.62(19) |
| O(9)-C(20)-Co(3)    | 178.7(2)   |
| O(10)-C(21)-Co(4)   | 179.2(2)   |
| O(11)-C(22)-Co(4)   | 178.3(2)   |
| O(12)-C(23)-Co(4)   | 179.4(2)   |
| Si(1)-C(24)-H(24A)  | 109.5      |
| Si(1)-C(24)-H(24B)  | 109.5      |
| H(24A)-C(24)-H(24B) | 109.5      |
| Si(1)-C(24)-H(24C)  | 109.5      |
| H(24A)-C(24)-H(24C) | 109.5      |
| H(24B)-C(24)-H(24C) | 109.5      |
| Si(1)-C(25)-H(25A)  | 109.5      |
| Si(1)-C(25)-H(25B)  | 109.5      |
| H(25A)-C(25)-H(25B) | 109.5      |
| Si(1)-C(25)-H(25C)  | 109.5      |
| H(25A)-C(25)-H(25C) | 109.5      |
| H(25B)-C(25)-H(25C) | 109.5      |
| Si(1)-C(26)-H(26A)  | 109.5      |
| Si(1)-C(26)-H(26B)  | 109.5      |
| H(26A)-C(26)-H(26B) | 109.5      |
| Si(1)-C(26)-H(26C)  | 109.5      |
| H(26A)-C(26)-H(26C) | 109.5      |
| H(26B)-C(26)-H(26C) | 109.5      |
| Si(2)-C(27)-H(27A)  | 109.5      |
| Si(2)-C(27)-H(27B)  | 109.5      |
| H(27A)-C(27)-H(27B) | 109.5      |
| Si(2)-C(27)-H(27C)  | 109.5      |
| H(27A)-C(27)-H(27C) | 109.5      |
| H(27B)-C(27)-H(27C) | 109.5      |
| C(30)-C(31)-C(32)   | 114.0(3)   |
| C(32)-C(31)-C(36)   | 114.7(5)   |
| C(30)-C(31)-H(31A)  | 108.8      |
| C(32)-C(31)-H(31A)  | 108.8      |
| C(30)-C(31)-H(31B)  | 108.8      |
| C(32)-C(31)-H(31B)  | 108.8      |
| H(31A)-C(31)-H(31B) | 107.7      |
| C(33)-C(32)-C(31)   | 115.0(3)   |
| C(33)-C(32)-H(32A)  | 108.5      |
| C(31)-C(32)-H(32A)  | 108.5      |
| C(33)-C(32)-H(32B)  | 108.5      |
| C(31)-C(32)-H(32B)  | 108.5      |
| H(32A)-C(32)-H(32B) | 107.5      |
| C(32)-C(33)-C(34)   | 114.9(3)   |
| C(32)-C(33)-H(33A)  | 108.5      |
| C(34)-C(33)-H(33A)  | 108.5      |
| C(32)-C(33)-H(33B)  | 108.5      |
| C(34)-C(33)-H(33B)  | 108.5      |
| H(33A)-C(33)-H(33B) | 107.5      |
| C(33)-C(34)-H(34A)  | 109.5      |
| C(33)-C(34)-H(34B)  | 109.5      |
| H(34A)-C(34)-H(34B) | 109.5      |
| C(33)-C(34)-H(34C)  | 109.5      |
| H(34A)-C(34)-H(34C) | 109.5      |
| H(34B)-C(34)-H(34C) | 109.5      |
| C(12)-Co(1)-C(13)   | 100.18(9)  |
| C(12)-Co(1)-C(14)   | 98.16(9)   |
| C(13)-Co(1)-C(14)   | 106.24(9)  |
| C(12)-Co(1)-C(9)    | 103.42(9)  |
| C(13)-Co(1)-C(9)    | 100.12(8)  |
| C(14)-Co(1)-C(9)    | 142.15(8)  |
| C(12)-Co(1)-C(8)    | 102.01(8)  |
| C(13)-Co(1)-C(8)    | 137.61(8)  |
| C(14)-Co(1)-C(8)    | 105.76(8)  |
| C(9)-Co(1)-C(8)     | 39.55(8)   |
| C(12)-Co(1)-Co(2)   | 151.24(6)  |

|                   |            |
|-------------------|------------|
| C(13)-Co(1)-Co(2) | 98.53(7)   |
| C(14)-Co(1)-Co(2) | 97.32(7)   |
| C(9)-Co(1)-Co(2)  | 51.58(6)   |
| C(8)-Co(1)-Co(2)  | 50.25(5)   |
| C(17)-Co(2)-C(15) | 100.67(10) |
| C(17)-Co(2)-C(16) | 99.85(9)   |
| C(15)-Co(2)-C(16) | 101.59(9)  |
| C(17)-Co(2)-C(8)  | 98.02(9)   |
| C(15)-Co(2)-C(8)  | 144.02(8)  |
| C(16)-Co(2)-C(8)  | 105.14(8)  |
| C(17)-Co(2)-C(9)  | 99.72(9)   |
| C(15)-Co(2)-C(9)  | 106.07(8)  |
| C(16)-Co(2)-C(9)  | 142.24(8)  |
| C(8)-Co(2)-C(9)   | 40.09(8)   |
| C(17)-Co(2)-Co(1) | 148.33(7)  |
| C(15)-Co(2)-Co(1) | 100.54(7)  |
| C(16)-Co(2)-Co(1) | 98.60(6)   |
| C(8)-Co(2)-Co(1)  | 52.14(6)   |
| C(9)-Co(2)-Co(1)  | 51.62(6)   |
| C(19)-Co(3)-C(18) | 100.21(9)  |
| C(19)-Co(3)-C(20) | 100.99(10) |
| C(18)-Co(3)-C(20) | 105.65(10) |
| C(19)-Co(3)-C(10) | 97.22(9)   |
| C(18)-Co(3)-C(10) | 100.57(9)  |
| C(20)-Co(3)-C(10) | 144.62(9)  |
| C(19)-Co(3)-C(11) | 99.45(9)   |
| C(18)-Co(3)-C(11) | 137.84(8)  |
| C(20)-Co(3)-C(11) | 106.66(9)  |
| C(10)-Co(3)-C(11) | 39.97(8)   |
| C(19)-Co(3)-Co(4) | 147.67(7)  |
| C(18)-Co(3)-Co(4) | 95.99(7)   |
| C(20)-Co(3)-Co(4) | 101.29(7)  |
| C(10)-Co(3)-Co(4) | 52.09(6)   |
| C(11)-Co(3)-Co(4) | 51.54(6)   |
| C(23)-Co(4)-C(22) | 98.15(10)  |
| C(23)-Co(4)-C(21) | 100.06(10) |
| C(22)-Co(4)-C(21) | 104.02(10) |
| C(23)-Co(4)-C(11) | 102.92(10) |
| C(22)-Co(4)-C(11) | 143.22(9)  |
| C(21)-Co(4)-C(11) | 101.56(9)  |
| C(23)-Co(4)-C(10) | 103.16(9)  |
| C(22)-Co(4)-C(10) | 106.38(9)  |
| C(21)-Co(4)-C(10) | 138.27(9)  |
| C(11)-Co(4)-C(10) | 39.53(8)   |
| C(23)-Co(4)-Co(3) | 151.83(7)  |
| C(22)-Co(4)-Co(3) | 98.45(7)   |
| C(21)-Co(4)-Co(3) | 97.80(7)   |
| C(11)-Co(4)-Co(3) | 51.89(6)   |
| C(10)-Co(4)-Co(3) | 50.11(6)   |
| C(7)-N(1)-C(1)    | 119.51(16) |
| C(24)-Si(1)-C(9)  | 110.35(10) |
| C(24)-Si(1)-C(25) | 110.07(13) |
| C(9)-Si(1)-C(25)  | 108.37(11) |
| C(24)-Si(1)-C(26) | 108.51(12) |
| C(9)-Si(1)-C(26)  | 108.25(10) |
| C(25)-Si(1)-C(26) | 111.28(13) |
| C(37)-Si(2)-C(27) | 119.4(8)   |
| C(28)-Si(2)-C(27) | 110.06(15) |
| C(37)-Si(2)-C(11) | 109.3(10)  |
| C(28)-Si(2)-C(11) | 112.89(14) |
| C(27)-Si(2)-C(11) | 110.42(11) |
| C(28)-Si(2)-C(29) | 108.6(3)   |
| C(27)-Si(2)-C(29) | 108.1(3)   |
| C(11)-Si(2)-C(29) | 106.6(4)   |
| C(37)-Si(2)-C(35) | 111.5(6)   |
| C(27)-Si(2)-C(35) | 101.5(3)   |
| C(11)-Si(2)-C(35) | 103.4(3)   |

|                     |       |
|---------------------|-------|
| Si(2)-C(28)-H(28A)  | 109.5 |
| Si(2)-C(28)-H(28B)  | 109.5 |
| H(28A)-C(28)-H(28B) | 109.5 |
| Si(2)-C(28)-H(28C)  | 109.5 |
| H(28A)-C(28)-H(28C) | 109.5 |
| H(28B)-C(28)-H(28C) | 109.5 |
| Si(2)-C(29)-H(29A)  | 109.5 |
| Si(2)-C(29)-H(29B)  | 109.5 |
| H(29A)-C(29)-H(29B) | 109.5 |
| Si(2)-C(29)-H(29C)  | 109.5 |
| H(29A)-C(29)-H(29C) | 109.5 |
| H(29B)-C(29)-H(29C) | 109.5 |
| C(31)-C(30)-H(30A)  | 109.5 |
| C(31)-C(30)-H(30B)  | 109.5 |
| H(30A)-C(30)-H(30B) | 109.5 |
| C(31)-C(30)-H(30C)  | 109.5 |
| H(30A)-C(30)-H(30C) | 109.5 |
| H(30B)-C(30)-H(30C) | 109.5 |
| Si(2)-C(35)-H(35A)  | 109.5 |
| Si(2)-C(35)-H(35B)  | 109.5 |
| H(35A)-C(35)-H(35B) | 109.5 |
| Si(2)-C(35)-H(35C)  | 109.5 |
| H(35A)-C(35)-H(35C) | 109.5 |
| H(35B)-C(35)-H(35C) | 109.5 |
| C(31)-C(36)-H(36A)  | 109.5 |
| C(31)-C(36)-H(36B)  | 109.5 |
| H(36A)-C(36)-H(36B) | 109.5 |
| C(31)-C(36)-H(36C)  | 109.5 |
| H(36A)-C(36)-H(36C) | 109.5 |
| H(36B)-C(36)-H(36C) | 109.5 |
| Si(2)-C(37)-H(37A)  | 109.5 |
| Si(2)-C(37)-H(37B)  | 109.5 |
| H(37A)-C(37)-H(37B) | 109.5 |
| Si(2)-C(37)-H(37C)  | 109.5 |
| H(37A)-C(37)-H(37C) | 109.5 |
| H(37B)-C(37)-H(37C) | 109.5 |

---

Symmetry transformations used to generate equivalent atoms:

#1 -x+1,y,-z+1/2

Complex N2

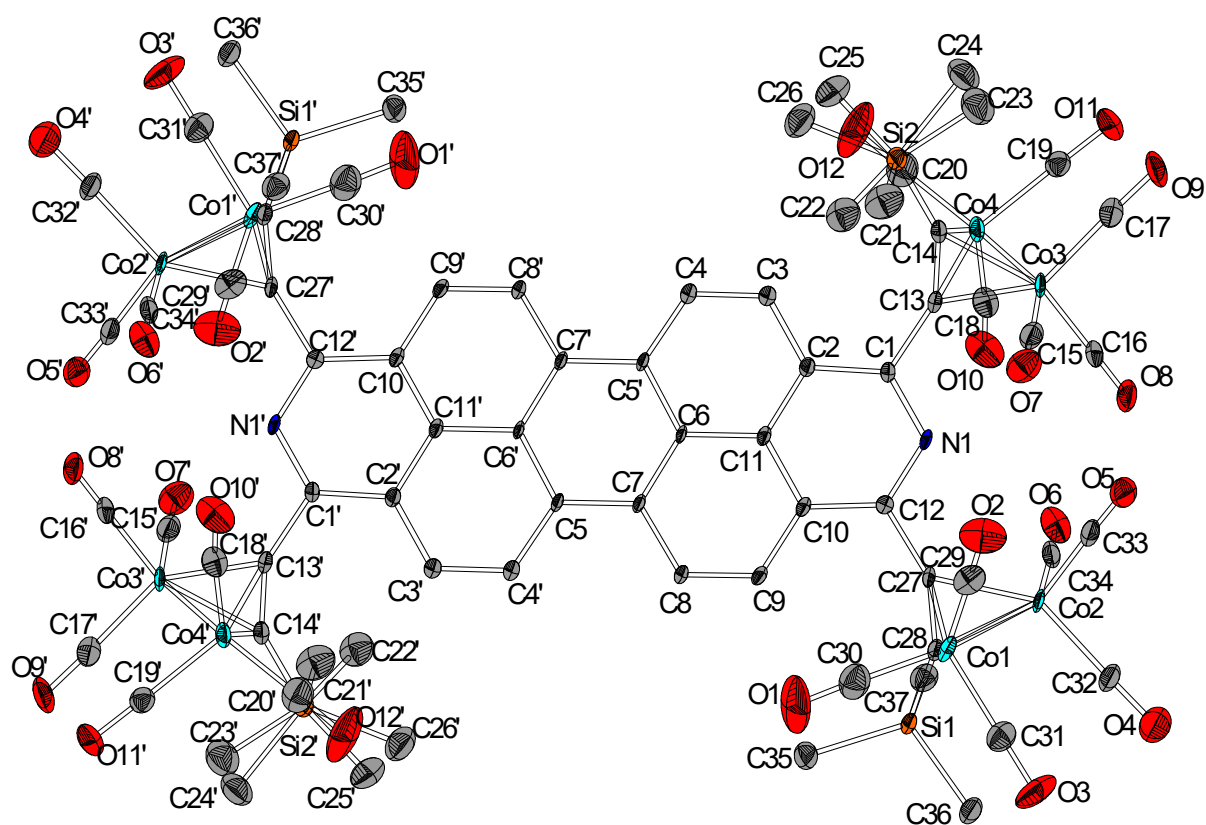

**Figure S20.** Reduced cell of the crystallographically determined molecular structure of **N2**. Protons and solvent molecules are not shown. Symmetry transformations: #1 -x,-y+1,-z+1

**Table 4.** Bond lengths [Å] and angles [°] for **N2**.

|             |            |
|-------------|------------|
| Co(1)-C(30) | 1.786(6)   |
| Co(1)-C(31) | 1.810(5)   |
| Co(1)-C(29) | 1.823(5)   |
| Co(1)-C(28) | 1.982(4)   |
| Co(1)-C(27) | 1.988(4)   |
| Co(1)-Co(2) | 2.4724(18) |
| C(1)-N(1)   | 1.350(5)   |
| C(1)-C(2)   | 1.417(6)   |
| C(1)-C(13)  | 1.468(6)   |
| N(1)-C(12)  | 1.342(5)   |
| O(1)-C(30)  | 1.154(7)   |
| Si(1)-C(28) | 1.859(4)   |
| Si(1)-C(37) | 1.860(5)   |
| Si(1)-C(36) | 1.865(4)   |
| Si(1)-C(35) | 1.875(5)   |
| Co(2)-C(34) | 1.789(5)   |
| Co(2)-C(33) | 1.817(5)   |
| Co(2)-C(32) | 1.817(4)   |
| Co(2)-C(27) | 1.953(4)   |
| Co(2)-C(28) | 1.997(4)   |
| C(2)-C(11)  | 1.410(6)   |
| C(2)-C(3)   | 1.423(5)   |
| O(2)-C(29)  | 1.129(6)   |
| Si(2)-C(25) | 1.841(12)  |
| Si(2)-C(22) | 1.847(13)  |
| Si(2)-C(21) | 1.851(10)  |
| Si(2)-C(23) | 1.855(14)  |
| Si(2)-C(24) | 1.858(10)  |

|              |            |
|--------------|------------|
| Si(2)-C(14)  | 1.861(4)   |
| Si(2)-C(26)  | 1.887(10)  |
| Co(4)-C(20)  | 1.784(5)   |
| Co(4)-C(19)  | 1.812(5)   |
| Co(4)-C(18)  | 1.832(5)   |
| Co(4)-C(13)  | 1.983(4)   |
| Co(4)-C(14)  | 1.998(4)   |
| Co(4)-Co(3)  | 2.4669(19) |
| C(4)-C(3)    | 1.369(6)   |
| C(4)-C(5)#1  | 1.422(6)   |
| C(4)-H(4)    | 0.9500     |
| O(4)-C(32)   | 1.139(5)   |
| Co(3)-C(15)  | 1.795(5)   |
| Co(3)-C(16)  | 1.815(5)   |
| Co(3)-C(17)  | 1.827(5)   |
| Co(3)-C(13)  | 1.956(4)   |
| Co(3)-C(14)  | 1.991(4)   |
| C(3)-H(3)    | 0.9500     |
| O(3)-C(31)   | 1.140(6)   |
| O(8)-C(16)   | 1.142(5)   |
| C(8)-C(9)    | 1.356(6)   |
| C(8)-C(7)    | 1.439(5)   |
| C(8)-H(8)    | 0.9500     |
| O(7)-C(15)   | 1.136(6)   |
| C(7)-C(6)    | 1.409(6)   |
| C(7)-C(5)    | 1.424(5)   |
| O(6)-C(34)   | 1.135(5)   |
| C(6)-C(5)#1  | 1.431(5)   |
| C(6)-C(11)   | 1.437(5)   |
| O(5)-C(33)   | 1.133(5)   |
| O(9)-C(17)   | 1.140(6)   |
| C(9)-C(10)   | 1.415(6)   |
| C(9)-H(9)    | 0.9500     |
| O(10)-C(18)  | 1.135(6)   |
| C(10)-C(12)  | 1.415(6)   |
| C(10)-C(11)  | 1.417(5)   |
| O(11)-C(19)  | 1.140(6)   |
| O(12)-C(20)  | 1.136(6)   |
| C(12)-C(27)  | 1.474(5)   |
| C(13)-C(14)  | 1.340(6)   |
| C(27)-C(28)  | 1.347(6)   |
| C(35)-H(35A) | 0.9800     |
| C(35)-H(35B) | 0.9800     |
| C(35)-H(35C) | 0.9800     |
| C(36)-H(36A) | 0.9800     |
| C(36)-H(36B) | 0.9800     |
| C(36)-H(36C) | 0.9800     |
| C(37)-H(37A) | 0.9800     |
| C(37)-H(37B) | 0.9800     |
| C(37)-H(37C) | 0.9800     |
| C(22)-H(22A) | 0.9800     |
| C(22)-H(22B) | 0.9800     |
| C(22)-H(22C) | 0.9800     |
| C(23)-H(23A) | 0.9800     |
| C(23)-H(23B) | 0.9800     |
| C(23)-H(23C) | 0.9800     |
| C(25)-H(25A) | 0.9800     |
| C(25)-H(25B) | 0.9800     |
| C(25)-H(25C) | 0.9800     |
| C(21)-H(21A) | 0.9800     |
| C(21)-H(21B) | 0.9800     |
| C(21)-H(21C) | 0.9800     |
| C(24)-H(24A) | 0.9800     |
| C(24)-H(24B) | 0.9800     |
| C(24)-H(24C) | 0.9800     |
| C(26)-H(26A) | 0.9800     |
| C(26)-H(26B) | 0.9800     |

|                   |            |
|-------------------|------------|
| C(26)-H(26C)      | 0.9800     |
| Cl(1)-C(39)       | 1.782(12)  |
| Cl(2)-C(39)       | 1.762(12)  |
| C(39)-H(39A)      | 0.9900     |
| C(39)-H(39B)      | 0.9900     |
| C(38)-Cl(3)       | 1.702(10)  |
| C(38)-Cl(4)       | 1.742(12)  |
| C(38)-H(38A)      | 0.9900     |
| C(38)-H(38B)      | 0.9900     |
|                   |            |
| C(30)-Co(1)-C(31) | 98.4(2)    |
| C(30)-Co(1)-C(29) | 100.0(2)   |
| C(31)-Co(1)-C(29) | 108.6(2)   |
| C(30)-Co(1)-C(28) | 102.2(2)   |
| C(31)-Co(1)-C(28) | 102.23(19) |
| C(29)-Co(1)-C(28) | 138.5(2)   |
| C(30)-Co(1)-C(27) | 106.9(2)   |
| C(31)-Co(1)-C(27) | 137.36(19) |
| C(29)-Co(1)-C(27) | 100.2(2)   |
| C(28)-Co(1)-C(27) | 39.68(16)  |
| C(30)-Co(1)-Co(2) | 153.37(17) |
| C(31)-Co(1)-Co(2) | 93.84(17)  |
| C(29)-Co(1)-Co(2) | 98.27(17)  |
| C(28)-Co(1)-Co(2) | 51.86(12)  |
| C(27)-Co(1)-Co(2) | 50.51(11)  |
| N(1)-C(1)-C(2)    | 123.2(4)   |
| N(1)-C(1)-C(13)   | 116.4(3)   |
| C(2)-C(1)-C(13)   | 120.4(3)   |
| C(12)-N(1)-C(1)   | 118.1(3)   |
| C(28)-Si(1)-C(37) | 106.3(2)   |
| C(28)-Si(1)-C(36) | 109.4(2)   |
| C(37)-Si(1)-C(36) | 111.6(2)   |
| C(28)-Si(1)-C(35) | 111.6(2)   |
| C(37)-Si(1)-C(35) | 110.8(2)   |
| C(36)-Si(1)-C(35) | 107.1(2)   |
| C(34)-Co(2)-C(33) | 99.4(2)    |
| C(34)-Co(2)-C(32) | 100.0(2)   |
| C(33)-Co(2)-C(32) | 101.4(2)   |
| C(34)-Co(2)-C(27) | 96.17(19)  |
| C(33)-Co(2)-C(27) | 106.44(18) |
| C(32)-Co(2)-C(27) | 145.0(2)   |
| C(34)-Co(2)-C(28) | 100.50(19) |
| C(33)-Co(2)-C(28) | 142.40(18) |
| C(32)-Co(2)-C(28) | 106.2(2)   |
| C(27)-Co(2)-C(28) | 39.86(17)  |
| C(34)-Co(2)-Co(1) | 147.07(14) |
| C(33)-Co(2)-Co(1) | 97.55(15)  |
| C(32)-Co(2)-Co(1) | 104.12(17) |
| C(27)-Co(2)-Co(1) | 51.78(13)  |
| C(28)-Co(2)-Co(1) | 51.30(13)  |
| C(11)-C(2)-C(1)   | 118.2(3)   |
| C(11)-C(2)-C(3)   | 118.6(4)   |
| C(1)-C(2)-C(3)    | 123.2(4)   |
| C(25)-Si(2)-C(22) | 111.4(6)   |
| C(25)-Si(2)-C(23) | 110.7(6)   |
| C(22)-Si(2)-C(23) | 109.6(7)   |
| C(21)-Si(2)-C(24) | 110.4(5)   |
| C(25)-Si(2)-C(14) | 111.5(4)   |
| C(22)-Si(2)-C(14) | 105.5(4)   |
| C(21)-Si(2)-C(14) | 109.9(3)   |
| C(23)-Si(2)-C(14) | 108.0(4)   |
| C(24)-Si(2)-C(14) | 108.2(3)   |
| C(21)-Si(2)-C(26) | 107.8(5)   |
| C(24)-Si(2)-C(26) | 106.7(5)   |
| C(14)-Si(2)-C(26) | 113.8(3)   |
| C(20)-Co(4)-C(19) | 98.9(2)    |
| C(20)-Co(4)-C(18) | 101.2(2)   |



|                    |            |
|--------------------|------------|
| C(19)-Co(4)-C(18)  | 106.7(2)   |
| C(20)-Co(4)-C(13)  | 111.1(2)   |
| C(19)-Co(4)-C(13)  | 139.15(19) |
| C(18)-Co(4)-C(13)  | 94.3(2)    |
| C(20)-Co(4)-C(14)  | 97.3(2)    |
| C(19)-Co(4)-C(14)  | 111.86(19) |
| C(18)-Co(4)-C(14)  | 133.7(2)   |
| C(13)-Co(4)-C(14)  | 39.36(17)  |
| C(20)-Co(4)-Co(3)  | 148.38(17) |
| C(19)-Co(4)-Co(3)  | 89.46(15)  |
| C(18)-Co(4)-Co(3)  | 105.50(16) |
| C(13)-Co(4)-Co(3)  | 50.73(12)  |
| C(14)-Co(4)-Co(3)  | 51.68(12)  |
| C(3)-C(4)-C(5)#1   | 122.1(4)   |
| C(3)-C(4)-H(4)     | 118.9      |
| C(5)#1-C(4)-H(4)   | 118.9      |
| C(15)-Co(3)-C(16)  | 101.6(2)   |
| C(15)-Co(3)-C(17)  | 98.8(2)    |
| C(16)-Co(3)-C(17)  | 104.9(2)   |
| C(15)-Co(3)-C(13)  | 97.6(2)    |
| C(16)-Co(3)-C(13)  | 101.78(19) |
| C(17)-Co(3)-C(13)  | 144.99(19) |
| C(15)-Co(3)-C(14)  | 101.31(19) |
| C(16)-Co(3)-C(14)  | 137.38(18) |
| C(17)-Co(3)-C(14)  | 106.45(19) |
| C(13)-Co(3)-C(14)  | 39.69(17)  |
| C(15)-Co(3)-Co(4)  | 148.52(15) |
| C(16)-Co(3)-Co(4)  | 92.65(14)  |
| C(17)-Co(3)-Co(4)  | 104.47(16) |
| C(13)-Co(3)-Co(4)  | 51.70(13)  |
| C(14)-Co(3)-Co(4)  | 51.91(12)  |
| C(4)-C(3)-C(2)     | 121.0(4)   |
| C(4)-C(3)-H(3)     | 119.5      |
| C(2)-C(3)-H(3)     | 119.5      |
| C(9)-C(8)-C(7)     | 121.7(4)   |
| C(9)-C(8)-H(8)     | 119.1      |
| C(7)-C(8)-H(8)     | 119.1      |
| C(6)-C(7)-C(5)     | 120.3(3)   |
| C(6)-C(7)-C(8)     | 118.1(4)   |
| C(5)-C(7)-C(8)     | 121.6(4)   |
| C(7)-C(6)-C(5)#1   | 120.9(4)   |
| C(7)-C(6)-C(11)    | 119.8(3)   |
| C(5)#1-C(6)-C(11)  | 119.2(4)   |
| C(4)#1-C(5)-C(7)   | 123.1(3)   |
| C(4)#1-C(5)-C(6)#1 | 118.1(4)   |
| C(7)-C(5)-C(6)#1   | 118.8(4)   |
| C(8)-C(9)-C(10)    | 121.5(4)   |
| C(8)-C(9)-H(9)     | 119.2      |
| C(10)-C(9)-H(9)    | 119.2      |
| C(12)-C(10)-C(9)   | 123.7(4)   |
| C(12)-C(10)-C(11)  | 117.8(4)   |
| C(9)-C(10)-C(11)   | 118.5(4)   |
| C(2)-C(11)-C(10)   | 118.9(4)   |
| C(2)-C(11)-C(6)    | 120.8(3)   |
| C(10)-C(11)-C(6)   | 120.3(4)   |
| N(1)-C(12)-C(10)   | 123.7(3)   |
| N(1)-C(12)-C(27)   | 116.1(4)   |
| C(10)-C(12)-C(27)  | 120.2(4)   |
| C(14)-C(13)-C(1)   | 145.1(4)   |
| C(14)-C(13)-Co(3)  | 71.6(2)    |
| C(1)-C(13)-Co(3)   | 131.8(3)   |
| C(14)-C(13)-Co(4)  | 70.9(3)    |
| C(1)-C(13)-Co(4)   | 132.3(3)   |
| Co(3)-C(13)-Co(4)  | 77.57(16)  |
| C(13)-C(14)-Si(2)  | 148.2(3)   |
| C(13)-C(14)-Co(3)  | 68.7(2)    |
| Si(2)-C(14)-Co(3)  | 129.2(2)   |

|                     |           |
|---------------------|-----------|
| C(13)-C(14)-Co(4)   | 69.7(2)   |
| Si(2)-C(14)-Co(4)   | 134.8(2)  |
| Co(3)-C(14)-Co(4)   | 76.41(15) |
| O(7)-C(15)-Co(3)    | 177.7(4)  |
| O(9)-C(17)-Co(3)    | 177.8(4)  |
| O(8)-C(16)-Co(3)    | 176.7(4)  |
| O(10)-C(18)-Co(4)   | 174.3(4)  |
| O(11)-C(19)-Co(4)   | 178.5(4)  |
| O(12)-C(20)-Co(4)   | 178.5(6)  |
| C(28)-C(27)-C(12)   | 144.4(4)  |
| C(28)-C(27)-Co(2)   | 71.8(2)   |
| C(12)-C(27)-Co(2)   | 132.6(3)  |
| C(28)-C(27)-Co(1)   | 69.9(2)   |
| C(12)-C(27)-Co(1)   | 132.8(3)  |
| Co(2)-C(27)-Co(1)   | 77.70(14) |
| C(27)-C(28)-Si(1)   | 148.6(3)  |
| C(27)-C(28)-Co(1)   | 70.4(2)   |
| Si(1)-C(28)-Co(1)   | 135.3(2)  |
| C(27)-C(28)-Co(2)   | 68.3(2)   |
| Si(1)-C(28)-Co(2)   | 127.3(2)  |
| Co(1)-C(28)-Co(2)   | 76.84(15) |
| O(2)-C(29)-Co(1)    | 178.2(4)  |
| O(1)-C(30)-Co(1)    | 178.2(5)  |
| O(3)-C(31)-Co(1)    | 177.8(5)  |
| O(4)-C(32)-Co(2)    | 178.4(5)  |
| O(5)-C(33)-Co(2)    | 177.8(4)  |
| O(6)-C(34)-Co(2)    | 177.0(4)  |
| Si(1)-C(35)-H(35A)  | 109.5     |
| Si(1)-C(35)-H(35B)  | 109.5     |
| H(35A)-C(35)-H(35B) | 109.5     |
| Si(1)-C(35)-H(35C)  | 109.5     |
| H(35A)-C(35)-H(35C) | 109.5     |
| H(35B)-C(35)-H(35C) | 109.5     |
| Si(1)-C(36)-H(36A)  | 109.5     |
| Si(1)-C(36)-H(36B)  | 109.5     |
| H(36A)-C(36)-H(36B) | 109.5     |
| Si(1)-C(36)-H(36C)  | 109.5     |
| H(36A)-C(36)-H(36C) | 109.5     |
| H(36B)-C(36)-H(36C) | 109.5     |
| Si(1)-C(37)-H(37A)  | 109.5     |
| Si(1)-C(37)-H(37B)  | 109.5     |
| H(37A)-C(37)-H(37B) | 109.5     |
| Si(1)-C(37)-H(37C)  | 109.5     |
| H(37A)-C(37)-H(37C) | 109.5     |
| H(37B)-C(37)-H(37C) | 109.5     |
| Si(2)-C(22)-H(22A)  | 109.5     |
| Si(2)-C(22)-H(22B)  | 109.5     |
| H(22A)-C(22)-H(22B) | 109.5     |
| Si(2)-C(22)-H(22C)  | 109.5     |
| H(22A)-C(22)-H(22C) | 109.5     |
| H(22B)-C(22)-H(22C) | 109.5     |
| Si(2)-C(23)-H(23A)  | 109.5     |
| Si(2)-C(23)-H(23B)  | 109.5     |
| H(23A)-C(23)-H(23B) | 109.5     |
| Si(2)-C(23)-H(23C)  | 109.5     |
| H(23A)-C(23)-H(23C) | 109.5     |
| H(23B)-C(23)-H(23C) | 109.5     |
| Si(2)-C(25)-H(25A)  | 109.5     |
| Si(2)-C(25)-H(25B)  | 109.5     |
| H(25A)-C(25)-H(25B) | 109.5     |
| Si(2)-C(25)-H(25C)  | 109.5     |
| H(25A)-C(25)-H(25C) | 109.5     |
| H(25B)-C(25)-H(25C) | 109.5     |
| Si(2)-C(21)-H(21A)  | 109.5     |
| Si(2)-C(21)-H(21B)  | 109.5     |
| H(21A)-C(21)-H(21B) | 109.5     |
| Si(2)-C(21)-H(21C)  | 109.5     |

|                     |          |
|---------------------|----------|
| H(21A)-C(21)-H(21C) | 109.5    |
| H(21B)-C(21)-H(21C) | 109.5    |
| Si(2)-C(24)-H(24A)  | 109.5    |
| Si(2)-C(24)-H(24B)  | 109.5    |
| H(24A)-C(24)-H(24B) | 109.5    |
| Si(2)-C(24)-H(24C)  | 109.5    |
| H(24A)-C(24)-H(24C) | 109.5    |
| H(24B)-C(24)-H(24C) | 109.5    |
| Si(2)-C(26)-H(26A)  | 109.5    |
| Si(2)-C(26)-H(26B)  | 109.5    |
| H(26A)-C(26)-H(26B) | 109.5    |
| Si(2)-C(26)-H(26C)  | 109.5    |
| H(26A)-C(26)-H(26C) | 109.5    |
| H(26B)-C(26)-H(26C) | 109.5    |
| Cl(2)-C(39)-Cl(1)   | 107.5(7) |
| Cl(2)-C(39)-H(39A)  | 110.2    |
| Cl(1)-C(39)-H(39A)  | 110.2    |
| Cl(2)-C(39)-H(39B)  | 110.2    |
| Cl(1)-C(39)-H(39B)  | 110.2    |
| H(39A)-C(39)-H(39B) | 108.5    |
| Cl(3)-C(38)-Cl(4)   | 115.6(7) |
| Cl(3)-C(38)-H(38A)  | 108.4    |
| Cl(4)-C(38)-H(38A)  | 108.4    |
| Cl(3)-C(38)-H(38B)  | 108.4    |
| Cl(4)-C(38)-H(38B)  | 108.4    |
| H(38A)-C(38)-H(38B) | 107.4    |

---

Symmetry transformations used to generate equivalent atoms:

#1 -x,-y+1,-z+1
